# Supplementary material for: Voting Patterns in Western European Countries. Class-Party Family Alignments and Their Mediation by Political Values
Source: Frontiers journal article supplement (doi:10.3389/fpos.2022.871129), 2022-05-31
Supplement: Data_Sheet_1.docx [file Data_Sheet_1.docx]

| TABLE S1. Political parties included in each of the six party families. The table continues in the next two pages. | | | | | | |
| --- | --- | --- | --- | --- | --- | --- |
| ***Country*** | **Radical Left** | **Center-Left** | **Center-Right** | **Radical Right** | **Green** | **Other Parties or Coalitions** |
| *Finland* | Left Wing Alliance | Social Democratic Party | National Coalition | True Finns | Ecological Party | Swedish People’s Party |
| Other parties of communist inspiration | Finish Christian League |  | Green Union | Finnish Christian League |
|  |  |  |
|  |  | Christian Democrats |  |  | Finnish Center |
|  |  |  |  |  | Other minor parties |
| *Sweden* | Left Party | Swedish Social Democratic Party | June List | Sweden Democrats | Environmental Party-The Greens | Center Party |
|  | Liberal People's Party |  | Feminist Initiative |
|  |  | Moderate Party |  |  | Pirate Party |
|  |  | Christian Democrats |  |  | Other minor parties |
| *Norway* | Red | Social Left Party | Conservative Party | Progress Party | GreenLeft | Center Party |
|  | Labour Party | Liberal Party |  |  | Coast Party |
|  |  | Christian Peoples' Party |  |  | Other minor parties |
|  |  |  |  |  |
| *United Kingdom* |  | Labour Party | Conservative Party | UK Independence Party | Green Party | Party of Wales |
|  |  | Liberal Democratic Party | British National Party |  | Scottish National Party |
|  |  |  |  | Democratic Unionist Party |
|  |  |  |  |  |
|  |  |  |  |  | Ourselves |
|  |  |  |  |  | Alliance |
|  |  |  |  |  | Northern Irish parties |
|  |  |  |  |  | Other minor parties |
| *Ireland* | Socialist Party | Labour Party | Soldiers of Destiny |  | Green Party | Other minor parties |
| United Left Alliance |  | Progressive Democrats |  |  |  |
| People Before Profit Alliance |  | Family of the Irish |  |  |  |
|  |  |  |  |  |
| Ourselves |  |  |  |  |  |
| *Belgium* | Workers’ Party of Belgium (PVDA & PTB) | Socialist Party (PS) | People's Party | National Front | Agalev | Other minor parties |
| Socialist Party (SP) | Christian Social Party/Humanist Democratic Center | Flemish Bloc/Flemish Interest | Green! |  |
| Socialist Party Different (SP.a-Spirit) | Ecolo |  |
|  |  |  |  |
|  |  | Christian People’s Party/Christian Democratic and Flemish (with New Flemish Alliance) |  |  |  |
|  |  |  |  |  |
|  |  |  |  |  |
|  |  |  |  |  |
|  |  |  |  |  |
|  |  | Open Flemish Liberals and Democrats |  |  |  |
|  |  |  |  |  |
|  |  | Reformist Movement |  |  |  |
|  |  | List Dedecker |  |  |  |
| *Netherlands* | Socialist Party | Labour Party | People’s Party for Freedom and Democracy | Center Democrats | GreenLeft | Political Reformed Party |
|  |  | Lijst Pim Fortuyn | Party for the Animals |
|  |  | Party for Freedom |  | Christian Union |
|  |  | Democrats 66 | Forum for Democracy |  | Reformed Political League |
|  | Christian Democratic Appeal |  |  |
|  |  |  |  | Reformed Political Federation |
|  |  |  |  |  |
|  |  |  |  |  | 50PLUS |
|  |  |  |  |  | Other minor parties |
| *France* | Workers’ Struggle/Revolutionary Communist League | Socialist Party | Union for French Democracy/Democratic Movement (with The Republic on the Move) | National Front/National Rally | Europe Ecology-The Greens | Hunting, Fishing, Nature, Tradition Party |
|  |
|  | National Republican Movement | Independent Ecological Movement | Other minor parties |
| French Communist Party |  |  |
|  | Liberal Democracy | Rally for France/Movement for France | Green Party |  |
| Left Party |  | Rally for the Republic |  |  |
| Left Radical Party |  | Union for Popular Movement |  |  |
| Unbowed France |  |  |  |  |
| Other communist and workers' parties |  | The Republicans |  |  |  |
|  | Centrist Alliance |  |  |  |
|  |  | New Center |  |  |  |
|  |  | The Republic Forward |  |  |  |
| *Germany* | Party of Democratic Socialism/The Left/Left Party | Social Democratic Party of Germany | Christian Democratic Union of Germany/Christian Social Union in Bavaria | Republikaner | Alliance 90/The Greens | Pirate Party of Germany |
| Alternative for Germany |
|  | Human Environment Animal Protection | Other minor parties |
|  |  | National Democratic Party of Germany/German People's Union |  |
|  |  | Free Democratic Party |  |  |
|  |  |  |  |  |
|  |  |  |  |  |
| *Switzerland* | Labour Party | Social Democratic Party | Christian Democratic People's Party | Swiss People's Party | Green Party | Other minor parties |
|  |  |  |  |
|  |  | Radical Party/Liberal Party |  |  |  |
|  |  |  |  |  |
|  |  | Green Liberal Party |  |  |  |
| *Spain* | United Left | Spanish Socialist Workers' Party (PSOE) | People's Party |  | The Greens | Convergence and Unity |
| We Can | Union, Progress, and Democracy |  | Initiative for Catalonia Greens |
|  |  |  | Initiative for Catalonia |
|  |  | Citizens-Party of the Citizenry |  | More Country |
|  |  |  |  | Other minor regionalist parties |
|  |  |  |  |  |
| *Portugal* | Left Bloc | Socialist Party | Democratic and Social Center/People's Party |  | Earth Party | Other minor parties |
| Democratic Unitarian Coalition |  |  | People-Animals-Nature |  |
|  | Democratic People's Party/Social Democratic Party |  |  |
| Other communist minor parties |  |  |  |  |
|  |  |  |  |

| TABLE S2. Linear regression models with political ideologies and attitudes as dependent variables and social class as independent variable. Marginal effects. Weighted data. | | | | | | |
| --- | --- | --- | --- | --- | --- | --- |
|  | **Economic conservatism** | **Social conservatism** | **Authoritarian pred.** | **Anti-immigration** | **EU distrust** | **Pol. Sys. Distrust** |
| Self-empl. prof. / large employers | 0.41*** | 0.35*** | 0.46*** | 0.38*** | 0.53*** | 0.51*** |
|  | (0.01) | (0.00) | (0.00) | (0.00) | (0.00) | (0.00) |
| Small business own. | 0.33*** | 0.40*** | 0.51*** | 0.46*** | 0.56*** | 0.55*** |
|  | (0.00) | (0.00) | (0.00) | (0.00) | (0.00) | (0.00) |
| Technical prof. | 0.35*** | 0.30*** | 0.50*** | 0.41*** | 0.53*** | 0.51*** |
|  | (0.00) | (0.00) | (0.00) | (0.00) | (0.00) | (0.00) |
| Clerks | 0.29*** | 0.37*** | 0.53*** | 0.45*** | 0.54*** | 0.55*** |
|  | (0.00) | (0.00) | (0.00) | (0.00) | (0.00) | (0.00) |
| Managers | 0.37*** | 0.34*** | 0.50*** | 0.40*** | 0.52*** | 0.49*** |
|  | (0.00) | (0.00) | (0.00) | (0.00) | (0.00) | (0.00) |
| Prod. workers | 0.26*** | 0.36*** | 0.54*** | 0.51*** | 0.58*** | 0.59*** |
|  | (0.00) | (0.00) | (0.00) | (0.00) | (0.00) | (0.00) |
| Socio-cultural prof. | 0.30*** | 0.37*** | 0.49*** | 0.37*** | 0.50*** | 0.49*** |
|  | (0.00) | (0.00) | (0.00) | (0.00) | (0.00) | (0.00) |
| Service workers | 0.26*** | 0.38*** | 0.53*** | 0.48*** | 0.56*** | 0.57*** |
|  | (0.00) | (0.00) | (0.00) | (0.00) | (0.00) | (0.00) |
| Adj R2 | 0.031 | 0.013 | 0.027 | 0.062 | 0.016 | 0.032 |
| N | 107 144 | 107 144 | 107 144 | 107 144 | 107 144 | 107 144 |

| TABLE S3. The Pearson correlation coefficients between the measures of the three political ideologies and the measures of the three political attitudes. N = 107 144. Weighted data. | | | | | | |
| --- | --- | --- | --- | --- | --- | --- |
|  | Economic conservatism | Social conservatism | Authoritarian pred. | Anti-immigration | EU distrust | Political system distrust |
| Economic conservatism | 1.00 |  |  |  |  |  |
| Social conservatism | -0.01*** | 1.00 |  |  |  |  |
| Authoritarian pred. | -0.09*** | 0.25*** | 1.00 |  |  |  |
| Anti-immigration | 0.00 | 0.11*** | 0.21*** | 1.00 |  |  |
| EU distrust | -0.04*** | -0.03*** | 0.03*** | 0.30*** | 1.00 |  |
| Political system distrust | -0.12*** | -0.03*** | 0.03*** | 0.34*** | 0.62*** | 1.00 |

| TABLE S4. Voting for the radical left, centre-left, centre-right and radical right: M0 and M1. Marginal effects (with standard errors) based on multinomial logistic regressions. Notes: *p < 0.10; **p < 0.05; ***p < 0.01. Weighted data. The table continues in the next page. | | | | | | | | | | | | |
| --- | --- | --- | --- | --- | --- | --- | --- | --- | --- | --- | --- | --- |
|  | M0 | M1+class | M0 | M1+class | M0 | M1+class | M0 | M1+class | M0 | M1+class | M0 | M1+class |
|  | **Radical Left** | | **Center-Left** | | **Center-Right** | | **Radical Right** | | **Green** | | **Other party or coalition** | |
| Female | -0.00** | -0.01*** | 0.02*** | 0.01*** | -0.02*** | -0.01*** | -0.03*** | -0.02*** | 0.03*** | 0.02*** | 0.00 | 0.00 |
|  | (0.00) | (0.00) | (0.00) | (0.00) | (0.00) | (0.00) | (0.00) | (0.00) | (0.00) | (0.00) | (0.00) | (0.00) |
| Age (ref. 18-34) |  |  |  |  |  |  |  |  |  |  |  |  |
| 35-64 | -0.01*** | -0.01*** | 0.02*** | 0.03*** | 0.03*** | 0.01*** | -0.01*** | -0.01*** | -0.02*** | -0.01*** | -0.02*** | -0.02*** |
|  | (0.00) | (0.00) | (0.01) | (0.00) | (0.01) | (0.00) | (0.00) | (0.00) | (0.00) | (0.00) | (0.00) | (0.00) |
| 65+ | -0.03*** | -0.03*** | 0.01 | 0.00 | 0.12*** | 0.10*** | -0.02*** | -0.02*** | -0.06*** | -0.03*** | -0.02*** | -0.02*** |
|  | (0.00) | (0.00) | (0.00) | (0.01) | (0.00) | (0.01) | (0.00) | (0.00) | (0.00) | (0.00) | (0.00) | (0.00) |
| Education (ref. Lower secondary or less) |  |  |  |  |  |  |  |  |  |  |  |  |
| Upper secondary | -0.01** | -0.00 | -0.05*** | -0.05*** | 0.05*** | 0.03*** | -0.02*** | -0.01*** | 0.02*** | 0.02*** | 0.00 | 0.01** |
|  | (0.00) | (0.00) | (0.00) | (0.00) | (0.00) | (0.00) | (0.00) | (0.00) | (0.00) | (0.00) | (0.00) | (0.00) |
| Post-secondary or tertiary | -0.02*** | -0.01** | -0.09*** | -0.07*** | 0.11*** | 0.07*** | -0.06*** | -0.04*** | 0.05*** | 0.04*** | -0.00 | 0.00 |
|  | (0.00) | (0.00) | (0.00) | (0.00) | (0.00) | (0.00) | (0.00) | (0.00) | (0.00) | (0.00) | (0.00) | (0.00) |
| Residence (ref. Small city) |  |  |  |  |  |  |  |  |  |  |  |  |
| Big City | 0.01*** | 0.01*** | 0.01*** | 0.02*** | -0.03*** | -0.04*** | -0.01*** | -0.01*** | 0.03*** | 0.03*** | -0.01*** | -0.01*** |
|  | (0.00) | (0.00) | (0.00) | (0.00) | (0.00) | (0.00) | (0.00) | (0.00) | (0.00) | (0.00) | (0.00) | (0.00) |
| Suburbs/Outskirts | 0.00 | 0.00 | -0.00 | -0.00 | -0.01 | -0.01*** | 0.00 | 0.01** | 0.01*** | 0.01*** | -0.01*** | -0.01*** |
|  | (0.00) | (0.00) | (0.00) | (0.00) | (0.00) | (0.00) | (0.00) | (0.00) | (0.00) | (0.00) | (0.00) | (0.00) |
| Village/Countryside | -0.01*** | -0.01*** | -0.05*** | -0.05*** | 0.04*** | 0.03*** | 0.01*** | 0.01*** | -0.01*** | -0.01*** | 0.04*** | 0.03*** |
|  | (0.00) | (0.00) | (0.00) | (0.00) | (0.00) | (0.00) | (0.00) | (0.00) | (0.00) | (0.00) | (0.00) | (0.00) |
| Social class (ref. Clerks) |  |  |  |  |  |  |  |  |  |  |  |  |
| Self-empl. prof. / large employers |  | -0.02*** |  | -0.10*** |  | 0.11*** |  | -0.01** |  | 0.02*** |  | -0.00 |
|  |  | (0.00) |  | (0.01) |  | (0.01) |  | (0.00) |  | (0.01) |  | (0.01) |
| Small business own. |  | -0.02*** |  | -0.10*** |  | 0.08*** |  | 0.00 |  | 0.00 |  | 0.03*** |
|  |  | (0.00) |  | (0.01) |  | (0.01) |  | (0.00) |  | (0.00) |  | (0.00) |
| Technical prof. |  | -0.00 |  | 0.00 |  | -0.00 |  | -0.01** |  | 0.01** |  | 0.00 |
|  |  | (0.00) |  | (0.01) |  | (0.01) |  | (0.00) |  | (0.00) |  | (0.00) |
| Prod. workers |  | 0.02*** |  | 0.05*** |  | -0.09*** |  | 0.03*** |  | -0.01*** |  | 0.00 |
|  |  | (0.00) |  | (0.01) |  | (0.01) |  | (0.00) |  | (0.00) |  | (0.00) |
| Managers |  | -0.01*** |  | -0.03*** |  | 0.07*** |  | -0.01*** |  | -0.00 |  | -0.01*** |
|  |  | (0.00) |  | (0.01) |  | (0.01) |  | (0.00) |  | (0.00) |  | (0.00) |
| Socio-cultural prof. |  | 0.02*** |  | 0.02*** |  | -0.05*** |  | -0.03*** |  | 0.03*** |  | 0.01 |
|  |  | (0.00) |  | (0.01) |  | (0.01) |  | (0.00) |  | (0.00) |  | (0.00) |
| Service workers |  | 0.01*** |  | 0.03*** |  | -0.06*** |  | 0.01*** |  | 0.00 |  | 0.00 |
|  |  | (0.00) |  | (0.01) |  | (0.01) |  | (0.00) |  | (0.00) |  | (0.00) |
| Employment status (ref. Employed) |  |  |  |  |  |  |  |  |  |  |  |  |
| Unemployed |  | 0.04*** |  | 0.01* |  | -0.08*** |  | 0.02*** |  | 0.02*** |  | -0.01*** |
|  |  | (0.00) |  | (0.01) |  | (0.01) |  | (0.00) |  | (0.00) |  | (0.00) |
| Student |  | 0.00 |  | -0.01* |  | -0.01 |  | -0.03*** |  | 0.05*** |  | -0.01 |
|  |  | (0.00) |  | (0.01) |  | (0.01) |  | (0.00) |  | (0.01) |  | (0.00) |
| Retired |  | 0.01*** |  | 0.02*** |  | -0.01 |  | 0.00 |  | -0.02*** |  | 0.01 |
|  |  | (0.00) |  | (0.01) |  | (0.01) |  | (0.00) |  | (0.00) |  | (0.00) |
| Household |  | -0.00 |  | -0.03*** |  | 0.02*** |  | 0.01*** |  | -0.00 |  | 0.01 |
|  |  | (0.00) |  | (0.01) |  | (0.01) |  | (0.00) |  | (0.00) |  | (0.00) |
| Other |  | 0.03*** |  | 0.02* |  | -0.07*** |  | 0.02*** |  | 0.00 |  | 0.00 |
|  |  | (0.00) |  | (0.01) |  | (0.01) |  | (0.00) |  | (0.00) |  | (0.00) |
| Country and *ESS* round dummies | yes | yes | yes | yes | yes | yes | yes | yes | yes | yes | yes | yes |
| McFadden R2 | 0.103 | 0.112 | 0.103 | 0.112 | 0.103 | 0.112 | 0.103 | 0.112 | 0.103 | 0.112 | 0.103 | 0.112 |
| N | 107 144 | 107 144 | 107 144 | 107 144 | 107 144 | 107 144 | 107 144 | 107 144 | 107 144 | 107 144 | 107 144 | 107 144 |

| TABLE S5. Voting for the radical left, centre-left, centre-right and radical right: M2 and M3. Marginal effects (with standard errors) based on multinomial logistic regressions. Notes: *p < 0.10; **p < 0.05; ***p < 0.01. Weighted data. The table continues in the next page. | | | | | | | | | | | | |
| --- | --- | --- | --- | --- | --- | --- | --- | --- | --- | --- | --- | --- |
|  | M4+eco | M5+soc | M4+eco | M5+soc | M4+eco | M5+soc | M4+eco | M5+soc | M4+eco | M5+soc | M4+eco | M5+soc |
|  | **Radical Left** | | **Center-Left** | | **Center-Right** | | **Radical Right** | | **Green** | | **Other party or coalition** | |
| Female | -0.01*** | 0.00* | 0.01** | 0.03*** | -0.00 | -0.03*** | -0.02*** | -0.02*** | 0.02*** | 0.03*** | 0.00 | -0.00 |
|  | (0.00) | (0.00) | (0.00) | (0.00) | (0.00) | (0.00) | (0.00) | (0.00) | (0.00) | (0.00) | (0.00) | (0.00) |
| Age (ref. 18-34) |  |  |  |  |  |  |  |  |  |  |  |  |
| 35-64 | -0.01*** | 0.00 | 0.03*** | 0.04*** | 0.02*** | -0.00 | -0.01*** | -0.01*** | -0.01*** | -0.00** | -0.02*** | -0.02*** |
|  | (0.00) | (0.00) | (0.00) | (0.00) | (0.00) | (0.00) | (0.00) | (0.00) | (0.00) | (0.00) | (0.00) | (0.00) |
| 65+ | -0.03*** | -0.01*** | 0.00 | 0.03*** | 0.11*** | 0.06*** | -0.02*** | -0.02*** | -0.03*** | -0.02*** | -0.02*** | -0.03*** |
|  | (0.00) | (0.00) | (0.01) | (0.01) | (0.01) | (0.01) | (0.00) | (0.00) | (0.00) | (0.00) | (0.00) | (0.00) |
| Education (ref. Lower secondary or less) |  |  |  |  |  |  |  |  |  |  |  |  |
| Upper secondary | -0.00 | -0.01*** | -0.04*** | -0.05*** | 0.03*** | 0.05*** | -0.01*** | -0.01*** | 0.02*** | 0.01*** | 0.01** | 0.01*** |
|  | (0.00) | (0.00) | (0.00) | (0.00) | (0.00) | (0.00) | (0.00) | (0.00) | (0.00) | (0.00) | (0.00) | (0.00) |
| Post-secondary or tertiary | -0.00 | -0.01*** | -0.06*** | -0.07*** | 0.05*** | 0.08*** | -0.04*** | -0.04*** | 0.04*** | 0.04*** | 0.00 | 0.00 |
|  | (0.00) | (0.00) | (0.00) | (0.00) | (0.00) | (0.00) | (0.00) | (0.00) | (0.00) | (0.00) | (0.00) | (0.00) |
| Residence (ref. Small city) |  |  |  |  |  |  |  |  |  |  |  |  |
| Big City | 0.01*** | 0.01*** | 0.02*** | 0.02*** | -0.04*** | -0.03*** | -0.01*** | -0.01*** | 0.03*** | 0.03*** | -0.01*** | -0.01*** |
|  | (0.00) | (0.00) | (0.00) | (0.00) | (0.00) | (0.00) | (0.00) | (0.00) | (0.00) | (0.00) | (0.00) | (0.00) |
| Suburbs/Outskirts | 0.00* | 0.00 | 0.00 | -0.00 | -0.02*** | -0.01* | 0.00 | 0.00 | 0.02*** | 0.01*** | -0.01*** | -0.01*** |
|  | (0.00) | (0.00) | (0.00) | (0.00) | (0.00) | (0.00) | (0.00) | (0.00) | (0.00) | (0.00) | (0.00) | (0.00) |
| Village/Countryside | -0.01*** | -0.01*** | -0.05*** | -0.05*** | 0.03*** | 0.02*** | 0.01*** | 0.01*** | -0.01*** | -0.01*** | 0.03*** | 0.03*** |
|  | (0.00) | (0.00) | (0.00) | (0.00) | (0.00) | (0.00) | (0.00) | (0.00) | (0.00) | (0.00) | (0.00) | (0.00) |
| Social class (ref. Clerks) |  |  |  |  |  |  |  |  |  |  |  |  |
| Self-empl. prof. / large employers | -0.01** | -0.02*** | -0.08*** | -0.10*** | 0.08*** | 0.11*** | -0.01*** | -0.01** | 0.03*** | 0.02*** | -0.00 | -0.00 |
|  | (0.01) | (0.01) | (0.01) | (0.01) | (0.01) | (0.01) | (0.00) | (0.00) | (0.01) | (0.01) | (0.01) | (0.01) |
| Small business own. | -0.01*** | -0.02*** | -0.10*** | -0.10*** | 0.07*** | 0.07*** | 0.00 | 0.00 | 0.01 | 0.00 | 0.04*** | 0.03*** |
|  | (0.00) | (0.00) | (0.01) | (0.01) | (0.01) | (0.01) | (0.00) | (0.00) | (0.00) | (0.00) | (0.00) | (0.00) |
| Technical prof. | 0.00 | -0.00 | 0.01 | -0.00 | -0.02** | 0.00 | -0.01** | -0.01** | 0.02*** | 0.01* | 0.00 | 0.00 |
|  | (0.00) | (0.00) | (0.01) | (0.01) | (0.01) | (0.01) | (0.00) | (0.00) | (0.01) | (0.00) | (0.00) | (0.00) |
| Prod. workers | 0.01*** | 0.02*** | 0.05*** | 0.05*** | -0.08*** | -0.09*** | 0.03*** | 0.03*** | -0.01*** | -0.01*** | 0.00 | 0.00 |
|  | (0.00) | (0.00) | (0.01) | (0.01) | (0.01) | (0.01) | (0.00) | (0.00) | (0.00) | (0.00) | (0.00) | (0.00) |
| Managers | -0.01*** | -0.01*** | -0.01*** | -0.03*** | 0.05*** | 0.07*** | -0.02*** | -0.01*** | 0.00 | -0.00 | -0.01*** | -0.01*** |
|  | (0.00) | (0.00) | (0.01) | (0.01) | (0.01) | (0.01) | (0.00) | (0.00) | (0.00) | (0.00) | (0.00) | (0.00) |
| Socio-cultural prof. | 0.02*** | 0.02*** | 0.02*** | 0.03*** | -0.04*** | -0.06*** | -0.03*** | -0.03*** | 0.03*** | 0.04*** | 0.01 | 0.00 |
|  | (0.00) | (0.00) | (0.01) | (0.01) | (0.01) | (0.01) | (0.00) | (0.00) | (0.00) | (0.00) | (0.00) | (0.00) |
| Service workers | 0.01** | 0.02*** | 0.03*** | 0.03*** | -0.05*** | -0.06*** | 0.01*** | 0.01*** | 0.00 | 0.00 | 0.00 | -0.00 |
|  | (0.00) | (0.00) | (0.01) | (0.01) | (0.01) | (0.01) | (0.00) | (0.00) | (0.00) | (0.00) | (0.00) | (0.00) |
| Employment status (ref. Employed) |  |  |  |  |  |  |  |  |  |  |  |  |
| Unemployed | 0.04*** | 0.04*** | 0.01 | 0.01* | -0.06*** | -0.07*** | 0.02*** | 0.02*** | 0.01*** | 0.02*** | -0.01*** | -0.01*** |
|  | (0.00) | (0.00) | (0.01) | (0.01) | (0.01) | (0.01) | (0.00) | (0.00) | (0.00) | (0.00) | (0.00) | (0.00) |
| Student | 0.01 | 0.00 | -0.01 | -0.02* | -0.01 | -0.00 | -0.03*** | -0.03*** | 0.05*** | 0.05*** | -0.01 | -0.01 |
|  | (0.00) | (0.00) | (0.01) | (0.01) | (0.01) | (0.01) | (0.00) | (0.00) | (0.01) | (0.01) | (0.00) | (0.00) |
| Retired | 0.00* | 0.01*** | 0.01** | 0.02*** | 0.00 | -0.02*** | 0.00 | 0.00 | -0.03*** | -0.02*** | 0.00 | 0.00 |
|  | (0.00) | (0.00) | (0.01) | (0.01) | (0.01) | (0.01) | (0.00) | (0.00) | (0.00) | (0.00) | (0.00) | (0.00) |
| Household | -0.00 | 0.00 | -0.03** | -0.02*** | 0.02*** | -0.00 | 0.01*** | 0.01*** | -0.00 | 0.00 | 0.01 | 0.00 |
|  | (0.00) | (0.00) | (0.01) | (0.01) | (0.01) | (0.01) | (0.00) | (0.00) | (0.00) | (0.00) | (0.00) | (0.00) |
| Other | 0.02*** | 0.03*** | 0.01 | 0.02** | -0.05*** | -0.07*** | 0.02*** | 0.02*** | -0.00 | 0.00 | 0.00 | 0.00 |
|  | (0.00) | (0.00) | (0.01) | (0.01) | (0.01) | (0.01) | (0.00) | (0.00) | (0.00) | (0.00) | (0.00) | (0.00) |
| Economic conservatism | -0.13*** |  | -0.22*** |  | 0.39*** |  | 0.03*** |  | -0.06*** |  | -0.01*** |  |
|  | (0.00) |  | (0.01) |  | (0.01) |  | (0.00) |  | (0.00) |  | (0.00) |  |
| Social conservatism |  | -0.16*** |  | -0.21*** |  | 0.39*** |  | -0.01*** |  | -0.08*** |  | 0.07*** |
|  |  | (0.00) |  | (0.01) |  | (0.01) |  | (0.00) |  | (0.00) |  | (0.00) |
| Country and *ESS* round dummies | yes | yes | yes | yes | yes | yes | yes | yes | yes | yes | yes | yes |
| McFadden R2 | 0.134 | 0.131 | 0.134 | 0.131 | 0.134 | 0.131 | 0.134 | 0.131 | 0.134 | 0.131 | 0.134 | 0.131 |
| N | 107 144 | 107 144 | 107 144 | 107 144 | 107 144 | 107 144 | 107 144 | 107 144 | 107 144 | 107 144 | 107 144 | 107 144 |

| TABLE S6. Voting for the radical left, centre-left, centre-right and radical right: M4 and M5. Marginal effects (with standard errors) based on multinomial logistic regressions. Notes: *p < 0.10; **p < 0.05; ***p < 0.01. Weighted data. The table continues in the next page. | | | | | | | | | | | | |
| --- | --- | --- | --- | --- | --- | --- | --- | --- | --- | --- | --- | --- |
|  | M6+ec*so | M7+aut | M6+ec*so | M7+aut | M6+ec*so | M7+aut | M6+ec*so | M7+aut | M6+ec*so | M7+aut | M6+ec*so | M7+aut |
|  | **Radical Left** | | **Center-Left** | | **Center-Right** | | **Radical Right** | | **Green** | | **Other party or coalition** | |
| Female | -0.00 | -0.01*** | 0.02*** | 0.01*** | -0.02*** | -0.02*** | -0.02*** | -0.02*** | 0.02*** | 0.02*** | -0.00 | 0.00 |
|  | (0.00) | (0.00) | (0.00) | (0.00) | (0.00) | (0.00) | (0.00) | (0.00) | (0.00) | (0.00) | (0.00) | (0.00) |
| Age (ref. 18-34) |  |  |  |  |  |  |  |  |  |  |  |  |
| 35-64 | -0.00 | -0.00 | 0.03*** | 0.03*** | 0.00 | 0.01* | -0.01*** | -0.01*** | -0.01** | -0.00 | -0.02*** | -0.02*** |
|  | (0.00) | (0.00) | (0.00) | (0.00) | (0.00) | (0.00) | (0.00) | (0.00) | (0.00) | (0.00) | (0.00) | (0.00) |
| 65+ | -0.01*** | -0.02*** | 0.03*** | 0.00 | 0.07*** | 0.09*** | -0.02*** | -0.02*** | -0.03*** | -0.02*** | -0.03*** | -0.03*** |
|  | (0.00) | (0.00) | (0.01) | (0.01) | (0.01) | (0.01) | (0.00) | (0.00) | (0.00) | (0.00) | (0.00) | (0.00) |
| Education (ref. Lower secondary or less) |  |  |  |  |  |  |  |  |  |  |  |  |
| Upper secondary | -0.01** | -0.00 | -0.05*** | -0.05*** | 0.04*** | 0.04*** | -0.01*** | -0.01*** | 0.01*** | 0.01*** | 0.01*** | 0.01** |
|  | (0.00) | (0.00) | (0.00) | (0.00) | (0.00) | (0.00) | (0.00) | (0.00) | (0.00) | (0.00) | (0.00) | (0.00) |
| Post-secondary or tertiary | -0.01*** | -0.01*** | -0.06*** | -0.07*** | 0.07*** | 0.08*** | -0.04*** | -0.04*** | 0.04*** | 0.04*** | 0.00 | 0.00 |
|  | (0.00) | (0.00) | (0.00) | (0.00) | (0.00) | (0.00) | (0.00) | (0.00) | (0.00) | (0.00) | (0.00) | (0.00) |
| Residence (ref. Small city) |  |  |  |  |  |  |  |  |  |  |  |  |
| Big City | 0.01*** | 0.01*** | 0.02*** | 0.02*** | -0.03*** | -0.04*** | -0.01*** | -0.01*** | 0.03*** | 0.03*** | -0.01*** | -0.01*** |
|  | (0.00) | (0.00) | (0.00) | (0.00) | (0.00) | (0.00) | (0.00) | (0.00) | (0.00) | (0.00) | (0.00) | (0.00) |
| Suburbs/Outskirts | 0.00 | 0.00 | -0.00 | -0.00 | -0.01*** | -0.01*** | 0.00* | 0.01** | 0.01*** | 0.01*** | -0.01*** | -0.01*** |
|  | (0.00) | (0.00) | (0.00) | (0.00) | (0.00) | (0.00) | (0.00) | (0.00) | (0.00) | (0.00) | (0.00) | (0.00) |
| Village/Countryside | -0.01*** | -0.01*** | -0.05*** | -0.05*** | 0.02*** | 0.03*** | 0.01*** | 0.01*** | -0.01*** | -0.01*** | 0.03*** | 0.03*** |
|  | (0.00) | (0.00) | (0.00) | (0.00) | (0.00) | (0.00) | (0.00) | (0.00) | (0.00) | (0.00) | (0.00) | (0.00) |
| Social class (ref. Clerks) |  |  |  |  |  |  |  |  |  |  |  |  |
| Self-empl. prof. / large employers | -0.01*** | -0.02*** | -0.08*** | -0.10*** | 0.08*** | 0.13*** | -0.01*** | -0.01** | 0.03*** | 0.01 | -0.00 | -0.00 |
|  | (0.00) | (0.00) | (0.01) | (0.01) | (0.01) | (0.01) | (0.00) | (0.00) | (0.01) | (0.00) | (0.01) | (0.01) |
| Small business own. | -0.01*** | -0.02*** | -0.09*** | -0.10*** | 0.06*** | 0.09*** | 0.00 | 0.00 | 0.01** | -0.00 | 0.03*** | 0.04*** |
|  | (0.00) | (0.00) | (0.01) | (0.01) | (0.01) | (0.01) | (0.00) | (0.00) | (0.00) | (0.00) | (0.00) | (0.00) |
| Technical prof. | -0.00 | -0.00 | 0.01 | 0.00 | -0.01 | -0.00 | -0.01** | -0.01** | 0.01** | 0.01* | 0.00 | 0.00 |
|  | (0.00) | (0.00) | (0.01) | (0.01) | (0.01) | (0.01) | (0.00) | (0.00) | (0.00) | (0.00) | (0.00) | (0.00) |
| Prod. workers | 0.01*** | 0.02*** | 0.05*** | 0.05*** | -0.08*** | -0.09*** | 0.03*** | 0.03*** | -0.01*** | -0.01*** | 0.00 | 0.00 |
|  | (0.00) | (0.00) | (0.01) | (0.01) | (0.01) | (0.01) | (0.00) | (0.00) | (0.00) | (0.00) | (0.00) | (0.00) |
| Managers | -0.01*** | -0.02*** | -0.01*** | -0.03*** | 0.05*** | 0.07*** | -0.02*** | -0.01*** | 0.00 | -0.01** | -0.01*** | -0.01*** |
|  | (0.00) | (0.00) | (0.01) | (0.01) | (0.01) | (0.01) | (0.00) | (0.00) | (0.00) | (0.00) | (0.00) | (0.00) |
| Socio-cultural prof. | 0.02*** | 0.02*** | 0.03*** | 0.02*** | -0.05*** | -0.05*** | -0.03*** | -0.03*** | 0.03*** | 0.03*** | 0.00 | 0.01* |
|  | (0.00) | (0.00) | (0.01) | (0.01) | (0.01) | (0.01) | (0.00) | (0.00) | (0.00) | (0.00) | (0.00) | (0.00) |
| Service workers | 0.01*** | 0.01*** | 0.03*** | 0.03*** | -0.06*** | -0.06*** | 0.01*** | 0.01*** | 0.00 | 0.00 | -0.00 | 0.00 |
|  | (0.00) | (0.00) | (0.01) | (0.01) | (0.01) | (0.01) | (0.00) | (0.00) | (0.00) | (0.00) | (0.00) | (0.00) |
| Employment status (ref. Employed) |  |  |  |  |  |  |  |  |  |  |  |  |
| Unemployed | 0.03*** | 0.04*** | 0.00 | 0.02** | -0.06*** | -0.08*** | 0.02*** | 0.02*** | 0.01** | 0.01*** | -0.01*** | -0.01*** |
|  | (0.00) | (0.00) | (0.01) | (0.01) | (0.01) | (0.01) | (0.00) | (0.00) | (0.00) | (0.00) | (0.00) | (0.00) |
| Student | 0.00 | 0.00 | -0.01 | -0.01 | -0.01 | 0.00 | -0.03*** | -0.03*** | 0.05*** | 0.04*** | -0.01 | -0.01 |
|  | (0.00) | (0.00) | (0.01) | (0.01) | (0.01) | (0.01) | (0.00) | (0.00) | (0.01) | (0.01) | (0.00) | (0.00) |
| Retired | 0.01*** | 0.01*** | 0.02*** | 0.02*** | -0.01* | -0.01** | 0.00 | 0.00 | -0.02*** | -0.02*** | 0.00 | 0.00 |
|  | (0.00) | (0.00) | (0.01) | (0.01) | (0.01) | (0.01) | (0.00) | (0.00) | (0.00) | (0.00) | (0.00) | (0.00) |
| Household | 0.00 | -0.00 | -0.02*** | -0.03*** | 0.00 | 0.01** | 0.01*** | 0.01*** | 0.00 | 0.00 | 0.00 | 0.00 |
|  | (0.00) | (0.00) | (0.01) | (0.01) | (0.01) | (0.01) | (0.00) | (0.00) | (0.00) | (0.00) | (0.00) | (0.00) |
| Other | 0.02*** | 0.03*** | 0.01 | 0.02* | -0.05*** | -0.07*** | 0.02*** | 0.02*** | -0.00 | 0.00 | 0.00 | 0.00 |
|  | (0.00) | (0.00) | (0.01) | (0.01) | (0.01) | (0.01) | (0.00) | (0.00) | (0.00) | (0.00) | (0.00) | (0.00) |
| Economic conservatism | -0.11*** |  | -0.21*** |  | 0.36*** |  | 0.03*** |  | -0.06*** |  | -0.01*** |  |
|  | (0.00) |  | (0.01) |  | (0.01) |  | (0.00) |  | (0.00) |  | (0.00) |  |
| Social conservatism | -0.15*** |  | -0.19*** |  | 0.36*** |  | -0.01*** |  | -0.08*** |  | 0.07*** |  |
|  | (0.00) |  | (0.01) |  | (0.01) |  | (0.00) |  | (0.00) |  | (0.00) |  |
| Authoritarian pred. |  | -0.09*** |  | 0.02 |  | 0.21*** |  | -0.00 |  | -0.17*** |  | 0.02*** |
|  |  | (0.01) |  | (0.01) |  | (0.01) |  | (0.01) |  | (0.01) |  | (0.01) |
| Interaction terms (ideol) | yes |  | yes |  | yes |  | yes |  | yes |  | yes |  |
| Country and *ESS* round dummies | yes | yes | yes | yes | yes | yes | yes | yes | yes | yes | yes | yes |
| McFadden R2 | 0.149 | 0.119 | 0.149 | 0.119 | 0.149 | 0.119 | 0.149 | 0.119 | 0.149 | 0.119 | 0.149 | 0.119 |
| N | 107 144 | 107 144 | 107 144 | 107 144 | 107 144 | 107 144 | 107 144 | 107 144 | 107 144 | 107 144 | 107 144 | 107 144 |

| TABLE S7. Voting for the radical left, centre-left, centre-right and radical right: M6 and M7. Marginal effects (with standard errors) based on multinomial logistic regressions. Notes: *p < 0.10; **p < 0.05; ***p < 0.01. Weighted data. The table continues in the next page. | | | | | | | | | | | | |
| --- | --- | --- | --- | --- | --- | --- | --- | --- | --- | --- | --- | --- |
|  | M2+ideol | M3+att | M2+ideol | M3+att | M2+ideol | M3+att | M2+ideol | M3+att | M2+ideol | M3+att | M2+ideol | M3+att |
|  | **Radical Left** | | **Center-Left** | | **Center-Right** | | **Radical Right** | | **Green** | | **Other party or coalition** | |
| Female | -0.00 | -0.00 | 0.02*** | 0.02*** | -0.02*** | -0.02*** | -0.02*** | -0.02*** | 0.02*** | 0.02*** | -0.00 | -0.00 |
|  | (0.00) | (0.00) | (0.00) | (0.00) | (0.00) | (0.00) | (0.00) | (0.00) | (0.00) | (0.00) | (0.00) | (0.00) |
| Age (ref. 18-34) |  |  |  |  |  |  |  |  |  |  |  |  |
| 35-64 | 0.00 | -0.00 | 0.03*** | 0.03*** | 0.00 | 0.00 | -0.01*** | -0.01*** | -0.00 | -0.00 | -0.02*** | -0.02*** |
|  | (0.00) | (0.00) | (0.00) | (0.00) | (0.00) | (0.00) | (0.00) | (0.00) | (0.00) | (0.00) | (0.00) | (0.00) |
| 65+ | -0.01*** | -0.01*** | 0.02*** | 0.02*** | 0.06*** | 0.06*** | -0.02*** | -0.02*** | -0.02*** | -0.02*** | -0.03*** | -0.03*** |
|  | (0.00) | (0.00) | (0.01) | (0.01) | (0.01) | (0.01) | (0.00) | (0.00) | (0.00) | (0.00) | (0.00) | (0.00) |
| Education (ref. Lower secondary or less) |  |  |  |  |  |  |  |  |  |  |  |  |
| Upper secondary | -0.01*** | -0.01** | -0.05*** | -0.06*** | 0.04*** | 0.04*** | -0.01*** | 0.00 | 0.01*** | 0.01*** | 0.01*** | 0.01*** |
|  | (0.00) | (0.00) | (0.00) | (0.00) | (0.00) | (0.00) | (0.00) | (0.00) | (0.00) | (0.00) | (0.00) | (0.00) |
| Post-secondary or tertiary | -0.01*** | -0.01*** | -0.06*** | -0.08*** | 0.07*** | 0.07*** | -0.04*** | -0.02*** | 0.04*** | 0.03*** | 0.00 | 0.01** |
|  | (0.00) | (0.00) | (0.00) | (0.00) | (0.00) | (0.00) | (0.00) | (0.00) | (0.00) | (0.00) | (0.00) | (0.00) |
| Residence (ref. Small city) |  |  |  |  |  |  |  |  |  |  |  |  |
| Big City | 0.01*** | 0.01*** | 0.02*** | 0.01*** | -0.03*** | -0.03*** | -0.01*** | -0.00 | 0.02*** | 0.02*** | -0.01*** | -0.01*** |
|  | (0.00) | (0.00) | (0.00) | (0.00) | (0.00) | (0.00) | (0.00) | (0.00) | (0.00) | (0.00) | (0.00) | (0.00) |
| Suburbs/Outskirts | 0.00 | 0.00 | -0.00 | -0.00 | -0.01*** | -0.01** | 0.00* | 0.01** | 0.01*** | 0.01*** | -0.01** | -0.01** |
|  | (0.00) | (0.00) | (0.00) | (0.00) | (0.00) | (0.00) | (0.00) | (0.00) | (0.00) | (0.00) | (0.00) | (0.00) |
| Village/Countryside | -0.01*** | -0.01*** | -0.05*** | -0.04*** | 0.02*** | 0.02*** | 0.01*** | 0.00 | -0.01*** | -0.01*** | 0.03*** | 0.03*** |
|  | (0.00) | (0.00) | (0.00) | (0.00) | (0.00) | (0.00) | (0.00) | (0.00) | (0.00) | (0.00) | (0.00) | (0.00) |
| Social class (ref. Clerks) |  |  |  |  |  |  |  |  |  |  |  |  |
| Self-empl. prof. / large employers | -0.01*** | -0.01*** | -0.08*** | -0.08*** | 0.09*** | 0.10*** | -0.01*** | -0.01** | 0.01*** | 0.01* | 0.00 | -0.00 |
|  | (0.00) | (0.00) | (0.01) | (0.01) | (0.01) | (0.01) | (0.00) | (0.00) | (0.01) | (0.00) | (0.01) | (0.01) |
| Small business own. | -0.01*** | -0.01*** | -0.09*** | -0.08*** | 0.06*** | 0.06*** | 0.00 | -0.00 | 0.00 | 0.00 | 0.03*** | 0.03*** |
|  | (0.00) | (0.00) | (0.01) | (0.01) | (0.01) | (0.01) | (0.00) | (0.00) | (0.00) | (0.00) | (0.00) | (0.00) |
| Technical prof. | -0.00 | -0.00 | 0.01 | 0.01 | -0.01 | -0.01 | -0.01** | -0.01** | 0.01** | 0.01* | 0.00 | 0.00 |
|  | (0.00) | (0.00) | (0.01) | (0.01) | (0.01) | (0.01) | (0.00) | (0.00) | (0.00) | (0.00) | (0.00) | (0.00) |
| Prod. workers | 0.01*** | 0.01*** | 0.05*** | 0.06*** | -0.08*** | -0.08*** | 0.03*** | 0.01*** | -0.01*** | -0.01* | 0.00 | 0.00 |
|  | (0.00) | (0.00) | (0.01) | (0.01) | (0.01) | (0.01) | (0.00) | (0.00) | (0.00) | (0.00) | (0.00) | (0.00) |
| Managers | -0.01*** | -0.01*** | -0.01** | -0.02*** | 0.05*** | 0.05*** | -0.02*** | -0.01*** | -0.00 | -0.00 | -0.01*** | -0.01** |
|  | (0.00) | (0.00) | (0.01) | (0.01) | (0.01) | (0.01) | (0.00) | (0.00) | (0.00) | (0.00) | (0.00) | (0.00) |
| Socio-cultural prof. | 0.02*** | 0.02*** | 0.03*** | 0.02*** | -0.05*** | -0.04*** | -0.03*** | -0.02*** | 0.03*** | 0.02*** | 0.00 | 0.00 |
|  | (0.00) | (0.00) | (0.01) | (0.01) | (0.01) | (0.01) | (0.00) | (0.00) | (0.00) | (0.00) | (0.00) | (0.00) |
| Service workers | 0.01*** | 0.01*** | 0.03*** | 0.04*** | -0.06*** | -0.06*** | 0.01*** | 0.01** | 0.00 | 0.00 | -0.00 | -0.00 |
|  | (0.00) | (0.00) | (0.01) | (0.01) | (0.01) | (0.01) | (0.00) | (0.00) | (0.00) | (0.00) | (0.00) | (0.00) |
| Employment status (ref. Employed) |  |  |  |  |  |  |  |  |  |  |  |  |
| Unemployed | 0.03*** | 0.03*** | 0.01 | 0.01* | -0.06*** | -0.05*** | 0.02*** | 0.01*** | 0.01** | 0.01*** | -0.01*** | -0.01*** |
|  | (0.00) | (0.00) | (0.01) | (0.01) | (0.01) | (0.01) | (0.00) | (0.00) | (0.00) | (0.00) | (0.00) | (0.00) |
| Student | 0.00 | 0.01 | -0.01 | -0.02** | -0.00 | -0.00 | -0.03*** | -0.02*** | 0.04*** | 0.03*** | -0.01 | -0.00 |
|  | (0.00) | (0.00) | (0.01) | (0.01) | (0.01) | (0.01) | (0.00) | (0.00) | (0.01) | (0.00) | (0.00) | (0.00) |
| Retired | 0.01*** | 0.01*** | 0.02*** | 0.02*** | -0.01** | -0.01** | 0.00 | 0.00 | -0.02*** | -0.02*** | 0.00 | 0.00 |
|  | (0.00) | (0.00) | (0.01) | (0.01) | (0.01) | (0.01) | (0.00) | (0.00) | (0.00) | (0.00) | (0.00) | (0.00) |
| Household | 0.00 | 0.00 | -0.02*** | -0.02*** | -0.00 | 0.00 | 0.01*** | 0.01** | 0.01* | 0.01* | 0.00 | 0.00 |
|  | (0.00) | (0.00) | (0.01) | (0.01) | (0.01) | (0.01) | (0.00) | (0.00) | (0.00) | (0.00) | (0.00) | (0.00) |
| Other | 0.02*** | 0.02*** | 0.01 | 0.02*** | -0.05*** | -0.05*** | 0.02*** | 0.01*** | -0.00 | 0.00 | 0.00 | -0.00 |
|  | (0.00) | (0.00) | (0.01) | (0.01) | (0.01) | (0.01) | (0.00) | (0.00) | (0.00) | (0.00) | (0.00) | (0.00) |
| Economic conservatism | -0.11*** | -0.10*** | -0.21*** | -0.21*** | 0.36*** | 0.35*** | 0.03*** | 0.02*** | -0.06*** | -0.05*** | -0.01*** | -0.01*** |
|  | (0.00) | (0.00) | (0.01) | (0.01) | (0.01) | (0.01) | (0.00) | (0.00) | (0.00) | (0.00) | (0.00) | (0.00) |
| Social conservatism | -0.15*** | -0.13*** | -0.20*** | -0.21*** | 0.35*** | 0.33*** | -0.01*** | -0.01** | -0.06*** | -0.05*** | 0.07*** | 0.07*** |
|  | (0.00) | (0.00) | (0.01) | (0.01) | (0.01) | (0.01) | (0.00) | (0.00) | (0.00) | (0.00) | (0.00) | (0.00) |
| Authoritarian pred. | -0.04*** | -0.03*** | 0.06*** | 0.08*** | 0.13*** | 0.07*** | 0.00 | -0.02*** | -0.15*** | -0.11*** | 0.00 | 0.00 |
|  | (0.01) | (0.01) | (0.01) | (0.01) | (0.01) | (0.01) | (0.01) | (0.01) | (0.01) | (0.01) | (0.01) | (0.01) |
| Interaction terms (ideol) |  | yes |  | yes |  | yes |  | yes |  | yes |  | yes |
| Anti-immigration |  | -0.05*** |  | -0.16*** |  | 0.17*** |  | 0.18*** |  | -0.14*** |  | -0.00 |
|  |  | (0.00) |  | (0.01) |  | (0.01) |  | (0.00) |  | (0.01) |  | (0.00) |
| EU distrust |  | 0.05*** |  | -0.05*** |  | -0.01 |  | 0.03*** |  | -0.03*** |  | 0.01*** |
|  |  | (0.00) |  | (0.01) |  | (0.01) |  | (0.00) |  | (0.00) |  | (0.01) |
| Political system distrust |  | 0.06*** |  | -0.05*** |  | -0.16*** |  | 0.07*** |  | 0.04*** |  | 0.04*** |
|  |  | (0.01) |  | (0.01) |  | (0.01) |  | (0.00) |  | (0.01) |  | (0.01) |
| Interaction terms (att) |  | yes |  | yes |  | yes |  | yes |  | yes |  | yes |
| Country and *ESS* round dummies | yes | yes | yes | yes | yes | yes | yes | yes | yes | yes | yes | yes |
| McFadden R2 | 0.152 | 0.175 | 0.152 | 0.175 | 0.152 | 0.175 | 0.152 | 0.175 | 0.152 | 0.175 | 0.152 | 0.175 |
| N | 107 144 | 107 144 | 107 144 | 107 144 | 107 144 | 107 144 | 107 144 | 107 144 | 107 144 | 107 144 | 107 144 | 107 144 |

Figure S1. Class voting polarization measure (kappa index) for party families (charts).

Figure S2. Class voting polarization measure (kappa index) for the whole models (chart).
